# Supplementary material for: A RASSCF study of free base, magnesium and zinc porphyrins: accuracy versus efficiency
Source: Royal Society of Chemistry journal article supplement (doi:10.1039/c2cp43982d), 2012-12-18
Supplement: c2cp43982d.pdf [file c2cp43982d.pdf]

# A RASSCF study of free base, magnesium and zinc porphyrins: accuracy versus efficiency

Andrew Kerridge

## Electronic Supplementary Information

### Tables

| State                          | a <sub>u</sub> | b <sub>1u</sub> | b <sub>2g</sub> | b <sub>3g</sub> | Weight (%) |
|--------------------------------|----------------|-----------------|-----------------|-----------------|------------|
| 1 <sup>1</sup> A <sub>g</sub>  | 2 0            | 2 2 2 0         | 2 2 0 0         | 2 2 0 0         | 80.9       |
| 1 <sup>1</sup> B <sub>2u</sub> | d 0            | 2 2 2 0         | 2 2 u 0         | 2 2 0 0         | 46.0       |
|                                | 2 0            | 2 2 u 0         | 2 2 0 0         | 2 2 d 0         | 33.5       |
| 1 <sup>1</sup> B <sub>3u</sub> | 2 0            | 2 2 u 0         | 2 2 d 0         | 2 2 0 0         | 42.0       |
|                                | d 0            | 2 2 2 0         | 2 2 0 0         | 2 2 u 0         | 30.5       |
| 2 <sup>1</sup> B <sub>2u</sub> | 2 0            | 2 u 2 0         | 2 2 0 0         | 2 2 d 0         | 30.6       |
|                                | 2 0            | 2 2 u 0         | 2 2 0 0         | 2 2 d 0         | 21.4       |
|                                | d 0            | 2 2 2 0         | 2 2 u 0         | 2 2 0 0         | 10.9       |
| 2 <sup>1</sup> B <sub>3u</sub> | 2 0            | 2 u 2 0         | 2 2 d 0         | 2 2 0 0         | 41.4       |
|                                | d 0            | 2 2 2 0         | 2 2 0 0         | 2 2 u 0         | 14.8       |
| 3 <sup>1</sup> B <sub>2u</sub> | 2 0            | 2 2 u 0         | 2 2 0 0         | 2 2 d 0         | 21.5       |
|                                | 2 0            | 2 u 2 0         | 2 2 0 0         | 2 2 d 0         | 20.1       |
|                                | d 0            | 2 2 2 0         | 2 2 u 0         | 2 2 0 0         | 19.5       |
| 3 <sup>1</sup> B <sub>3u</sub> | d 0            | 2 2 2 0         | 2 2 0 0         | 2 2 u 0         | 24.2       |
|                                | 2 0            | 2 2 u 0         | 2 2 d 0         | 2 2 0 0         | 19.9       |
|                                | 2 0            | 2 u 2 0         | 2 2 d 0         | 2 2 0 0         | 14.6       |
| 4 <sup>1</sup> B <sub>2u</sub> | 2 0            | u 2 2 0         | 2 2 0 0         | 2 2 d 0         | 63.1       |
|                                | d 0            | 2 2 2 0         | 2 u 0 0         | 2 2 2 0         | 10.0       |
| 4 <sup>1</sup> B <sub>3u</sub> | 2 0            | u 2 2 0         | 2 2 d 0         | 2 2 0 0         | 40.5       |
|                                | d 0            | 2 2 2 0         | 2 u d 0         | 2 2 u 0         | 10.7       |

Table S1. Occupations of active space orbitals in leading configurations the <sup>1</sup>A<sub>g</sub> ground and low lying <sup>1</sup>B<sub>2u</sub> and <sup>1</sup>B<sub>3u</sub> excited states of free base porphyrin. Only those configurations with weight greater than 10% are shown. 2 = doubly occupied, u = singly occupied (spin up), d = single occupied (spin down), 0 = unoccupied.

| Active Space           | CSFs (%)           |
|------------------------|--------------------|
| CASSCF(16,14)          | 537,705 (100)      |
| RASSCF(16,2,2;8,0,6)   | 325 (0.06)         |
| RASSCF(16,3,3;8,0,6)   | 3,545 (0.66)       |
| RASSCF(16,4,4;8,0,6)   | 22,685 (4.22)      |
| RASSCF(16,2,2;6,4,4)   | 4,628 (0.86)       |
| RASSCF(16,3,3;6,4,4)   | 33,448 (6.22)      |
| RASSCF(16,4,4;6,4,4)   | 127,911 (23.79)    |
| RASSCF(16,3,3;5,5,4)   | 57,683 (10.72)     |
| RASSCF(16,3,3;4,6,4)   | 80,665 (15.00)     |
| RASSCF(16,3,3;3,7,4)   | 96,756 (17.99)     |
| RASSCF(16,4,4;3,7,4)   | 250,171 (46.53)    |
| RASSCF(16,5,5;3,7,4)   | 412,215 (76.77)    |
| RASSCF(16,3,3;2,8,4)   | 103,936 (19.33)    |
| RASSCF(16,4,4;2,8,4)   | 254,685 (47.37)    |
| RASSCF(26,2,2;13,0,11) | 2,665 (0.49)       |
| RASSCF(26,3,3;13,0,11) | 94,500 (17.57)     |
| RASSCF(26,2,2;11,4,9)  | 63,258 (11.76)     |
| RASSCF(26,3,3;11,4,9)  | 1,877,565 (349.18) |

Table S2. Number of configuration state functions (CSFs) in the CI-space for varying levels of MCSCF calculations on ground states of H<sub>2</sub>P, MgP and ZnP. Details of the active space compositions are given in the main text. Percentage values are relative to the CASSCF(16,14) reference.

| State                                                          | a <sub>u</sub> | b <sub>1u</sub> | b <sub>2g</sub> | b <sub>3g</sub> | Weight (%)  |
|----------------------------------------------------------------|----------------|-----------------|-----------------|-----------------|-------------|
| 1 <sup>1</sup> A <sub>g</sub>                                  | 0 0            | 2 2 2 0         | 2 2 0 0         | 2 2 0 0         | 82.0 (82.2) |
| 1 <sup>1</sup> E <sub>u</sub> ( <sup>1</sup> B <sub>2u</sub> ) | 2 0            | 2 2 u 0         | 2 2 0 0         | 2 2 d 0         | 38.5 (37.6) |
|                                                                | d 0            | 2 2 2 0         | 2 2 u 0         | 2 2 0 0         | 38.0 (38.7) |
| 1 <sup>1</sup> E <sub>u</sub> ( <sup>1</sup> B <sub>3u</sub> ) | 2 0            | 2 2 u 0         | 2 2 d 0         | 2 2 0 0         | 38.5 (37.6) |
|                                                                | d 0            | 2 2 2 0         | 2 2 2 0         | 2 2 u 0         | 38.0 (38.7) |
| 2 <sup>1</sup> E <sub>u</sub> ( <sup>1</sup> B <sub>2u</sub> ) | 2 0            | 2 u 2 0         | 2 2 0 0         | 2 2 d 0         | 42.9 (44.6) |
|                                                                | d 0            | 2 2 2 0         | 2 2 u 0         | 2 2 0 0         | 13.1 (11.7) |
|                                                                | 2 0            | 2 2 u 0         | 2 2 0 0         | 2 2 d 0         | 12.1 (11.5) |
| 2 <sup>1</sup> E <sub>u</sub> ( <sup>1</sup> B <sub>3u</sub> ) | 2 0            | 2 u 2 0         | 2 2 d 0         | 2 2 0 0         | 42.9 (44.6) |
|                                                                | d 0            | 2 2 2 0         | 2 2 0 0         | 2 2 u 0         | 13.1 (11.7) |
|                                                                | 2 0            | 2 2 u 0         | 2 2 d 0         | 2 2 0 0         | 12.1 (11.5) |
| 3 <sup>1</sup> E <sub>u</sub> ( <sup>1</sup> B <sub>2u</sub> ) | 2 0            | u 2 2 0         | 2 2 0 0         | 2 2 d 0         | 20.1 (19.4) |
|                                                                | 2 0            | 2 u 2 0         | 2 2 0 0         | 2 2 d 0         | 17.8 (15.3) |
|                                                                | 2 0            | 2 2 u 0         | 2 2 0 0         | 2 2 d 0         | 15.8 (18.0) |
|                                                                | d 0            | 2 2 2 0         | 2 2 u 0         | 2 2 0 0         | 13.9 (15.7) |
| 3 <sup>1</sup> E <sub>u</sub> ( <sup>1</sup> B <sub>3u</sub> ) | 2 0            | u 2 2 0         | 2 2 d 0         | 2 2 0 0         | 20.1 (19.4) |
|                                                                | 2 0            | 2 u 2 0         | 2 2 d 0         | 2 2 0 0         | 17.8 (15.3) |
|                                                                | 2 0            | 2 2 u 0         | 2 2 d 0         | 2 2 0 0         | 15.8 (18.0) |
|                                                                | d 0            | 2 2 2 0         | 2 2 0 0         | 2 2 u 0         | 13.9 (15.7) |
| 4 <sup>1</sup> E <sub>u</sub> ( <sup>1</sup> B <sub>2u</sub> ) | 2 0            | u 2 2 0         | 2 2 0 0         | 2 2 d 0         | 27.3 (28.3) |
|                                                                | d 0            | 2 2 2 0         | 2 2 u 0         | 2 u d 0         | 13.1 (13.8) |
|                                                                | d 0            | 2 2 2 0         | 2 2 u 0         | 2 2 0 0         | 10.7 (9.6)  |
| 4 <sup>1</sup> E <sub>u</sub> ( <sup>1</sup> B <sub>3u</sub> ) | 2 0            | u 2 2 0         | 2 2 d 0         | 2 2 0 0         | 27.3 (28.3) |
|                                                                | d 0            | 2 2 2 0         | 2 u d 0         | 2 2 u 0         | 13.1 (13.8) |
|                                                                | d 0            | 2 2 2 0         | 2 2 0 0         | 2 2 u 0         | 10.7 (9.6)  |

Table S3. Occupations of active space orbitals in leading configurations the <sup>1</sup>A<sub>g</sub> ground and low lying <sup>1</sup>E<sub>u</sub> excited states of magnesium and zinc porphyrin. Only those configurations with weight greater than 10% are shown. 2 = doubly occupied, u = singly occupied (spin up), d = single occupied (spin down), 0 = unoccupied.

## Figure Captions

**Figure S1.** Comparison of the natural occupation numbers of the frontier orbitals of MgP and ZnP calculated using different active spaces. Solid circles correspond to integer occupancies of 0, 1 and 2 whilst dashed circles indicate occupancies of 0.1, 0.9, 1.1 and 1.9. Occupations lying between the values marked by the dashed circles indicate strongly multiconfigurational character<sup>63</sup>.

**Figure S2.** Density differences of excited states of MgP and ZnP, calculated using different active spaces approaches. (a) CASSCF(16,14)-RASSCF(16,3,3;6,4,4) (b) CASSCF(16,14)-RASSCF(16,3,3;2,8,4).
